# Supplementary material for: Novel Antibacterial Agents SAAP-148 and Halicin Combat Gram-Negative Bacteria Colonizing Catheters
Source: MDPI journal article supplement (doi:10.3390/antibiotics12121743), 2023-12-16
Supplement: s1 [file s1]

## Supplementary materials

**Supplementary table S1.** Antibiotics tested in this study

| Strains                   | Antibiotic                  | Concentration (µg/mL) |
|---------------------------|-----------------------------|-----------------------|
| <i>Enterobacteriaceae</i> | Amoxicillin-clavulanic acid | 20+10                 |
|                           | Ceftazidime                 | 30                    |
|                           | Cefotaxime                  | 30                    |
|                           | Cefepim                     | 30                    |
|                           | Cefoxitin                   | 30                    |
|                           | Gentamycin                  | 10                    |
|                           | Imipenem                    | 10                    |
|                           | Ciprofloxacin               | 5                     |
|                           | Tetracycline                | 30                    |
|                           | Nalidixic acid              | 30                    |
|                           | Co-trimoxazole              | 25                    |
|                           | Ceftazidime                 | 30                    |
|                           | Cefotaxime                  | 30                    |
|                           | Cefepim                     | 30                    |
| <i>Acinetobacter spp.</i> | Cefoxitin                   | 30                    |
|                           | Gentamycin                  | 10                    |
|                           | Imipenem                    | 10                    |
|                           | Ciprofloxacin               | 5                     |
|                           | Tetracycline                | 30                    |
|                           | Co-trimoxazole              | 25                    |

**Supplementary table S2.** Target genes and primers used in this study.

| Target organism              | Gene name     | Gene function              | Forward primer              | Reverse primer       | Product (bp) | Reference |
|------------------------------|---------------|----------------------------|-----------------------------|----------------------|--------------|-----------|
| <i>Klebsiella pneumoniae</i> | <i>mrkD</i>   | Adhesin type 3 fimbriae    | AAGCTATCGCTGTACTTCCG<br>GCA | GGCGTTGGCGCTCAGATAGG | 340          | [139]     |
|                              | <i>fimH-1</i> | Adhesin type1 fimbriae     | ATGAACGCCTGGTCCTTTGC        | GCTGAACGCCTATCCCCTGC | 688          | [140]     |
|                              | <i>ycfM</i>   | Outer membrane lipoprotein | ATCAGCAGTCGGGTCAGC          | CTTCTCCAGCATTAGCG    | 160          | [141]     |
|                              | <i>ecpA</i>   | <i>E. coli</i>             | AATGGTTCACCGGGACATCA        | AAGGATGAAATATCGCCGAC | 759          | [142]     |

|                     |             | common pilus               | TGTC                            | ATCC                                 |     |       |
|---------------------|-------------|----------------------------|---------------------------------|--------------------------------------|-----|-------|
| <i>E. coli</i>      | <i>fimH</i> | Fimbrial adhesins          | TGCAGAACGGATAAGCCGT<br>G        | GCAGTCACCTGCCCTCCGGTA                | 508 | [143] |
|                     | <i>csgA</i> | Curli adhesin              | ACTCTGACTTGACTATTACC            | AGATGCAGTCTGGTCAAC                   | 200 | [144] |
|                     | <i>hlyF</i> | Putative hemolysin         | TCGTTTAGGGTGCTTACCTTC<br>AAC    | TTTGGCGGTTTAGGCATTCC                 | 444 | [145] |
| <i>A. baumannii</i> | <i>csuE</i> | Adhesins                   | ATGCATGTTCTCTGGACTGA<br>TGTTGAC | CGACTTGTACCGTGACCGTAT<br>CTTGATAAG   | 976 | [146] |
|                     | <i>ompA</i> | efflux system              | CAATTGTTATCTCTGGAG              | ACCTTGAGTAGACAAACGA                  | 966 |       |
|                     | <i>bap</i>  | biofilm-associated protein | TAG GGA GGG TAC CAA TGC<br>AG   | TCA TGA TTT GAT GCT GCA<br>GCG ATA A | 400 | [147] |

**Supplementary table S3.** PCR programs for virulence genes detection

| Gene           | Initial denaturation<br>temperature ( time) | Denaturation<br>temperature (time) | Annealing<br>temperature<br>(time) | Extension<br>temperature<br>(time ) | Number<br>of cycles | Final extension<br>temperature<br>(time) | Final<br>concentration<br>(μM) |
|----------------|---------------------------------------------|------------------------------------|------------------------------------|-------------------------------------|---------------------|------------------------------------------|--------------------------------|
| <i>*mrkD</i>   | 95°C (5min)                                 | 94°C (30s)                         | 60°C (90s)                         | 72°C (1min)                         | 30                  | 72°C (10min)                             | 0.1                            |
| <i>*fimH-1</i> |                                             |                                    |                                    |                                     |                     |                                          |                                |
| <i>ycfM</i>    | 95°C (4min)                                 | 95°C (45s)                         | 55°C (1min)                        | 72°C (1min)                         | 30                  | 72°C (5min)                              | 0.4                            |
| <i>*ecpA</i>   |                                             |                                    |                                    |                                     |                     |                                          |                                |
| <i>fimH</i>    | 94°C (5 min)                                | 94°C (60s)                         | 55°C (60s)                         | 72°C (2min)                         | 35                  | 72°C (10min)                             |                                |
| <i>csgA</i>    | 95°C (3 min)                                | 94°C (1min)                        | 48°C (1min)                        | 72°C (1min)                         | 30                  | 72°C (5min)                              | 0.4                            |
| <i>*hlyF</i>   | 94°C (3 min)                                | 94°C (1 min)                       | 51°C (60s)                         | 72°C (1 min)                        | 30                  | 72°C (10 min)                            |                                |
| <i>csuE</i>    | 95°C for 10min                              | 95°C for 30s                       | 63°C for 30s                       | 72°C for 1min                       | 35                  | 72°C for 10min                           |                                |
| <i>ompA</i>    | 95°C for 10min                              | 95°C for 30s                       | 52°C for 30s                       | 72°C for 1min                       | 35                  | 72°C for 10min                           |                                |

|            |               |              |              |               |    |               |
|------------|---------------|--------------|--------------|---------------|----|---------------|
| <i>bap</i> | 95°C for 2min | 95°C for 30s | 61°C for 30s | 68°C for 1min | 30 | 68°C for 2min |
|------------|---------------|--------------|--------------|---------------|----|---------------|

\*Modifications have been made in the PCR program

**Supplementary table S4.** Concentrations of SAAP-148 and halicin tested in the checkerboard

| Strain                   | 24-hrs treatment                  |                                  |                      |                      |
|--------------------------|-----------------------------------|----------------------------------|----------------------|----------------------|
|                          | Final concentration SAAP-148 (μM) | Final concentration Halicin (μM) | Control SAAP-148(μM) | Control Halicin (μM) |
| <i>E. coli</i> EC2       | 3.2-25.6                          | 3.2-12.8                         | 3.2-102.4            | 3.2-51.2             |
| <i>A. baumannii</i> AB1  | 3.2-25.6                          | 12.8-51.2                        | 3.2-102.4            | 12.8-204.8           |
| <i>K. pneumoniae</i> KP1 | 3.2-25.6                          | 12.8-102.4                       | 3.2-102.4            | 12.8-204.8           |
| <i>K. pneumoniae</i> KP2 | 3.2-25.6                          | 12.8-102.4                       | 3.2-102.4            | 12.8-204.8           |

## References

- 139 Compain, F.; Babosan, A.; Brisse, S.; Genel, N.; Audou, J.; Ailloud, F.; Kassis-Chikhani, N.; Arlet, G.; Decré, D. Multiplex PCR for detection of seven virulence factors and K1/K2 capsular serotypes of *Klebsiella pneumoniae*. *J. clin. Microbiol.* **2014**, *52*, 4377–4380. <https://doi.org/10.1128/JCM.02316-14>
- 140 Shah, R. K.; Ni, Z. H.; Sun, X. Y.; Wang, G. Q.; Li, F. The Determination and Correlation of Various Virulence Genes, ESBL, Serum Bactericidal Effect and Biofilm Formation of Clinical Isolated Classical *Klebsiella pneumoniae* and Hypervirulent *Klebsiella pneumoniae* from Respiratory Tract Infected Patients. *Pol. J. Microbiol.* **2017**, *66*, 501–508. <https://doi.org/10.5604/01.3001.0010.7042>
- 141 El Fertas-Aissani, R.; Messai, Y.; Alouache, S.; Bakour, R. Virulence profiles and antibiotic susceptibility patterns of *Klebsiella pneumoniae* strains isolated from different clinical specimens. *Pathol. Biol (Paris)*. **2013**, *61*, 209–216. <https://doi.org/10.1016/j.patbio.2012.10.004>
- 142 Cruz-Córdova, A.; Esteban-Kenel, V.; Espinosa-Mazariego, K.; Ochoa S.A.; Espinosa, S.M.; de la Garza Elhain, A.; Rendón, E.F.; Villegas, E.O.L.; Xicohtencatl-Cortes, J. Pathogenic determinants of clinical *Klebsiella pneumoniae* strains associated with their persistence in the hospital environment. *Bol. Med. Hosp. Infant. Mex.* **2014**, *71*, 1.
- 143 Yun, K. W.; Kim, H. Y.; Park, H. K.; Kim, W.; Lim, I. S. Virulence factors of uropathogenic *Escherichia coli* of urinary tract infections and asymptomatic bacteriuria in children. *J. Microbiol. Immunol. Infect.* **2014**, *47*, 455–461. <https://doi.org/10.1016/j.jmii.2013.07.010>
- 144 Pal, M.; Singh, S. PCR based detection of adhesive curli gene “crl” and ‘csgA’ in avian pathogenic *Escherichia coli*. *Indian J. Anim. Res.* **2007**, *41*, 226–229.
- 145 Moulin-Schouleur, M.; Réperant, M.; Laurent, S.; Brée, A.; Mignon-Grasteau, S.; Germon, P.; Rasschaert, D.; Schouler, C. Extraintestinal pathogenic *Escherichia coli* strains of avian and human origin: link between phylogenetic relationships and common virulence patterns. *J. Clin. Microbiol.* **2007**, *45*, 3366–3376. <https://doi.org/10.1128/JCM.00037-07>
- 146 Liu, H.; Wu, Y. Q.; Chen, L. P.; Gao, X.; Huang, H. N.; Qiu, F. L.; Wu, D. C. Biofilm-Related Genes: Analyses in Multi-Antibiotic Resistant *Acinetobacter Baumannii* Isolates From Mainland China. *Med. Sci. Monit.* **2016**, *22*, 1801–1807. <https://doi.org/10.12659/msm.898959>

147      Fallah, A.; Rezaee, M. A.; Hasani, A.; Barhaghi, M. H. S.; Kafil, H. S. Frequency of *bap* and *cpaA* virulence genes in drug resistant clinical isolates of *Acinetobacter baumannii* and their role in biofilm formation. *Iran. J. Basic. Med. Sci.* **2017**, 20, 849–855. <https://doi.org/10.22038/IJBMS.2017.9105>
